# Supplementary material for: Multi-elemental chalcogeniden-BiCdSe films grown under controlled depth voltammetry: improved photo-electrochemical behaviour toward energy conversion
Source: Royal Society of Chemistry journal article supplement (doi:10.1039/c8nj01304g), 2018-01-01
Supplement: c8nj01304g1.pdf [file c8nj01304g1.pdf]

**Supplementary Information**

**Multi-elemental chalcogenide  $n$ -BiCdSe films grown under  
controlled depth voltammetry: Improved photo-electrochemical  
behaviour toward energy conversion**

Mukul Hazra, Sudeshna Chatterjee<sup>2</sup>, Jayati Datta\*<sup>1</sup>  
Department of Chemistry, Indian Institute of Engineering Science & Technology,  
Shibpur, Howrah, India

\* Corresponding author.

Tel.: +91 33 2668 4561–63 ext. 514; Fax: +91 33 2668 2916

*E-mail address:* Jayati Datta: jayati\_datta@rediffmail.com

1. *Present address:* Department of Chemistry, Renewable Energy Research Centre,  
Heritage Institute of Technology, Kolkata-700 107, West Bengal, India
2. Department of Chemistry, Sarojini Naidu College for Women, Kolkata, West  
Bengal, India

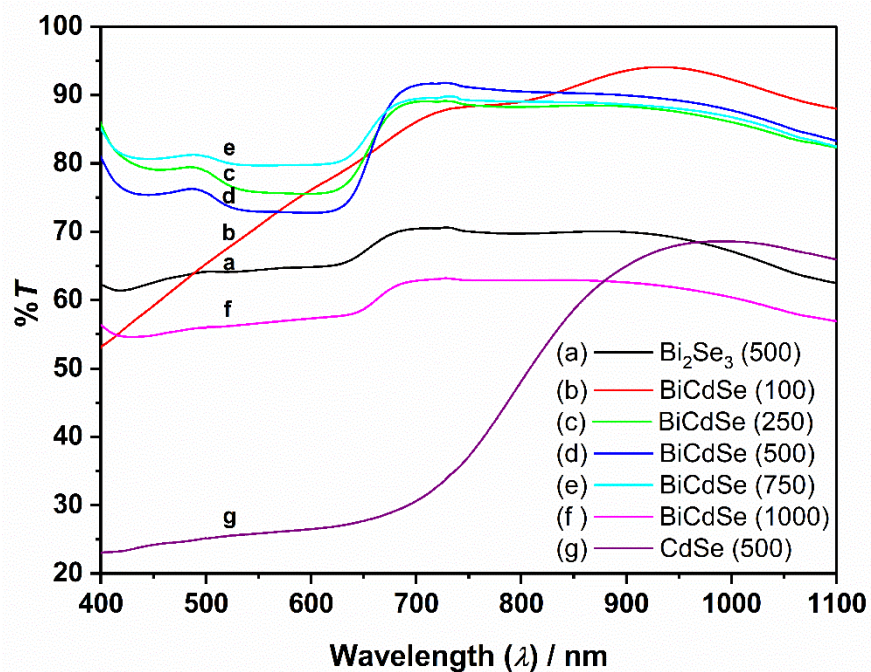

Fig. S1. Transmittance spectra of the synthesized thin films.

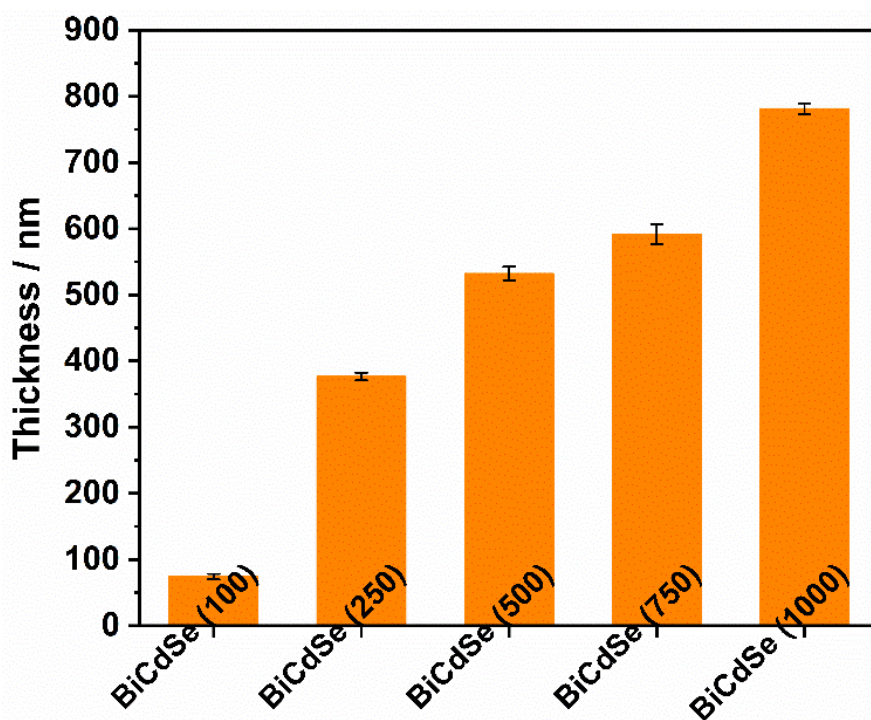

Fig. S2. Thickness profile of the composite BiCdSe films.

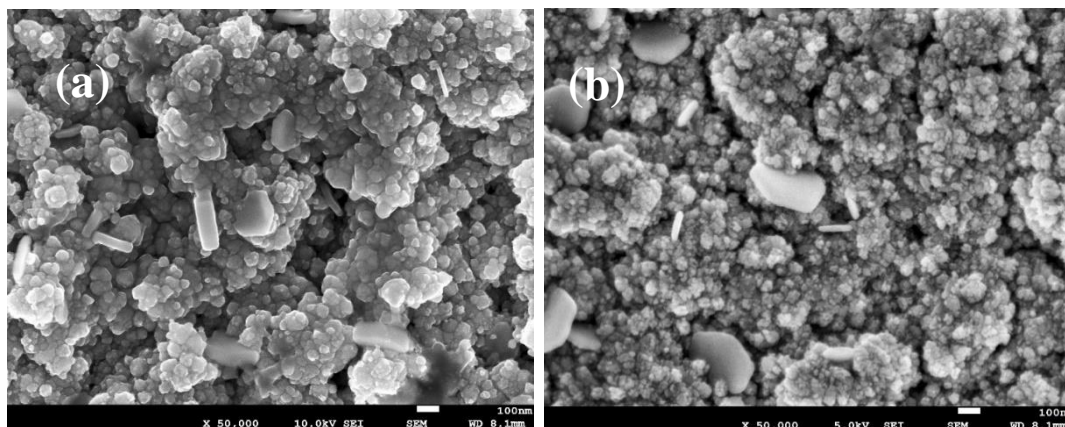

**Fig. S3.** Typical FESEM images of BiCdSe developed under (a) 250 and (b) 750 cycles.

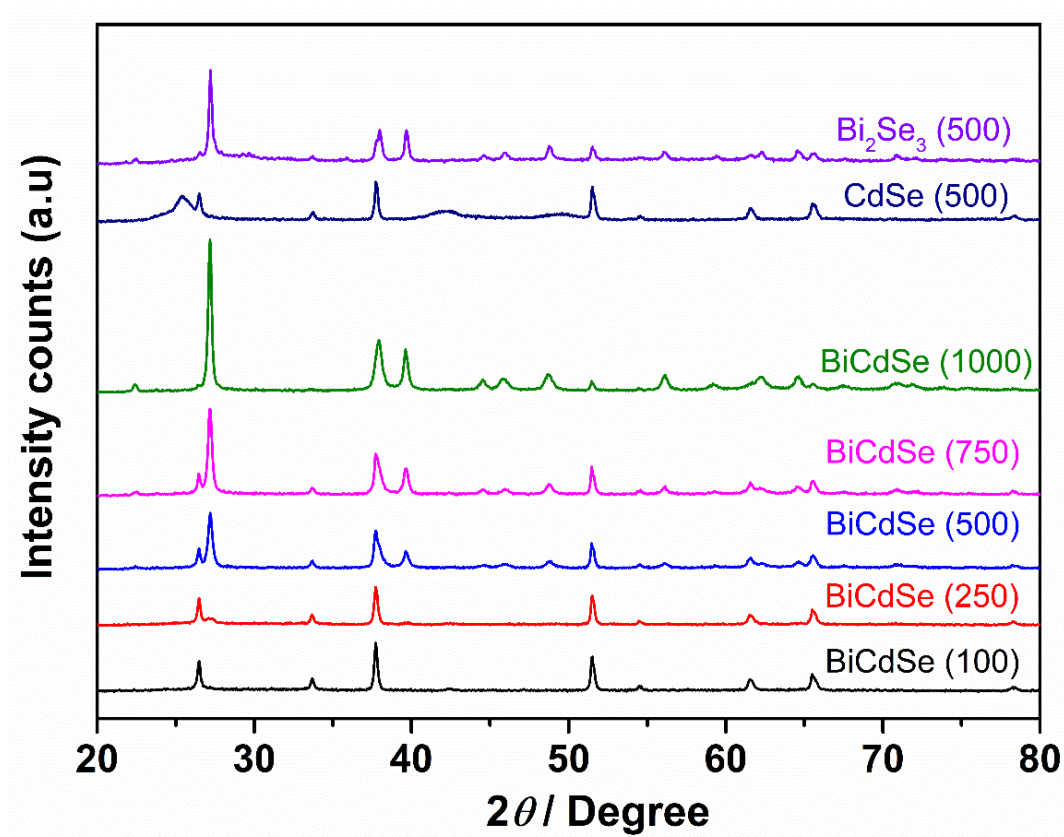

**Fig. S4.** XRD patterns of all the composite BiCdSe films and CdSe, Bi<sub>2</sub>Se<sub>3</sub> films deposited under 500 cycles.

**Table S1.** EIS records of electrochemically deposited films.

| SC Materials                          | $R_{ct}$<br>/ $\Omega$ | CPE / $\mu\text{F cm}^{-2}$ | $N_D \times 10^{-21}$ / $\text{cm}^{-3}$ | $V_{fb}$ (vs SCE)/V |
|---------------------------------------|------------------------|-----------------------------|------------------------------------------|---------------------|
| CdSe (500)                            | 320                    | 6.8                         | 0.02                                     | -2.018              |
| BiCdSe (100)                          | 810                    | 222.0                       | 2.36                                     | -0.225              |
| BiCdSe (250)                          | 231                    | 531.0                       | 9.07                                     | -0.462              |
| BiCdSe (500)                          | 145                    | 762.6                       | 20.13                                    | -0.514              |
| BiCdSe (750)                          | 568                    | 784.6                       | 3.97                                     | -0.449              |
| BiCdSe (1000)                         | 885                    | 206.4                       | 0.50                                     | -0.363              |
| Bi <sub>2</sub> Se <sub>3</sub> (500) | 410                    | 528.0                       | 0.46                                     | -0.932              |

**Table S2.** Potentiodynamic Polarization and ASV parameters for the deposited films.

| SC Materials                          | $i_{corr} \times 10^5$<br>/ $\text{A cm}^{-2}$ | $E_{corr}$ / V | $r_{corr} \times 10^{11}$<br>/ $\text{kgcm}^{-2}\text{s}^{-1}$ | VA analysis results /<br>ppm     |                                  |
|---------------------------------------|------------------------------------------------|----------------|----------------------------------------------------------------|----------------------------------|----------------------------------|
|                                       |                                                |                |                                                                | Estimated<br>[Cd <sup>2+</sup> ] | Estimated<br>[Bi <sup>3+</sup> ] |
| CdSe (500)                            | 0.07                                           | -0.028         | 0.07                                                           | 0.19                             | -                                |
| BiCdSe (100)                          | 0.97                                           | -0.413         | 0.81                                                           | 0.12                             | 3.39                             |
| BiCdSe (250)                          | 1.02                                           | -0.481         | 0.86                                                           | 0.19                             | 5.73                             |
| BiCdSe (500)                          | 2.19                                           | -0.426         | 1.85                                                           | 0.42                             | 8.91                             |
| BiCdSe (750)                          | 2.71                                           | -0.446         | 2.29                                                           | 1.21                             | 20.29                            |
| BiCdSe (1000)                         | 5.03                                           | -0.471         | 4.23                                                           | 1.38                             | 29.06                            |
| Bi <sub>2</sub> Se <sub>3</sub> (500) | 11.12                                          | -0.507         | 12.58                                                          | -                                | 31.01                            |

**Table S3.** *J-V* characteristics of electrochemically deposited semiconductor films.

| <b>SC Materials</b>                   | <b><math>J_{sc} / \text{mA cm}^{-2}</math></b> | <b><math>\% \eta</math></b> | <b><math>\% FF</math></b> |
|---------------------------------------|------------------------------------------------|-----------------------------|---------------------------|
| Bi <sub>2</sub> Se <sub>3</sub> (500) | 6.77                                           | 1.24                        | 13.81                     |
| BiCdSe (100)                          | 2.42                                           | 0.85                        | 25.31                     |
| BiCdSe (250)                          | 4.71                                           | 1.78                        | 25.95                     |
| BiCdSe (500)                          | 5.58                                           | 2.57                        | 32.98                     |
| BiCdSe (750)                          | 3.38                                           | 0.79                        | 20.35                     |
| BiCdSe (1000)                         | 2.62                                           | 0.65                        | 18.83                     |
| CdSe (500)                            | 1.52                                           | 0.36                        | 16.88                     |
